# Supplementary material for: Directing the research agenda on water and energy technologies with process and economic analysis
Source: Royal Society of Chemistry journal article supplement (doi:10.1039/d2ee03271f), 2023-01-01
Supplement: d2ee03271f1.pdf [file d2ee03271f1.pdf]

## Supporting Information

# Directing the Research Agenda on Water and Energy Technologies with Process and Economic Analysis

Boreum Lee,<sup>1</sup> Li Wang,<sup>1</sup> Zhangxin Wang,<sup>2</sup> Nathaniel J. Cooper,<sup>1</sup> and Menachem Elimelech<sup>1,\*</sup>

<sup>1</sup>Department of Chemical and Environmental Engineering, Yale University, New Haven, Connecticut 06520-8286, USA

<sup>2</sup>School of Ecology, Environment and Resources, Guangdong University of Technology, Guangzhou, 510006, China

\* Corresponding author.

### **Note S1. Calculation of Extractable Energy.**

The energy that can be extracted by mixing river water and seawater is limited by the Gibbs free energy of mixing,  $\Delta G_{mix}$ , which can be calculated by

$$\Delta G_{mix} = \nu RT [c_M \ln(c_M) - \gamma c_B \ln(c_B) - (1 - \gamma) c_D \ln(c_D)] \quad (S1)$$

where  $\nu$  is the van't Hoff factor ( $\nu = 2$  for NaCl solutions),  $\gamma$  is the volume ratio of brine solution over the total volume of both brine and dilute solutions, and  $c_M$ ,  $c_B$ , and  $c_D$  are concentrations of final mixed solution, brine concentration, and dilute concentration, respectively. Note that  $\Delta G_{mix}$  is the specific maximum energy that can be extracted normalized by the total volume of brine and dilute solutions.

**Table S1. Summary of extractable energy achieved by various technologies**

| <b>Technology</b> | <b>Extractable Energy (kWh m<sup>-3</sup>)</b> | <b>Reference</b>          |
|-------------------|------------------------------------------------|---------------------------|
| PRO               | 0.125                                          | (Yip and Elimelech, 2014) |
|                   | 0.153                                          | (Yip and Elimelech, 2014) |
| RED               | 0.088                                          | (Yip and Elimelech, 2012) |
|                   | 0.094                                          | (Yip and Elimelech, 2012) |
|                   | 0.101                                          | (Yip and Elimelech, 2012) |
|                   | 0.111                                          | (Yip and Elimelech, 2012) |
| NPG               | 0.020                                          | (Wang et al., 2021)       |
|                   | 0.025                                          | (Wang et al., 2022)       |

**Table S2. Summary of power density achieved by various technologies**

| <b>Technology</b> | <b>Power density (W m<sup>-2</sup>)</b> | <b>Reference</b>          |
|-------------------|-----------------------------------------|---------------------------|
| PRO               | 2.4                                     | (Yip and Elimelech, 2014) |
|                   | 3.7                                     | (Yip and Elimelech, 2014) |
|                   | 6.1                                     | (Tiraferri et al., 2011)  |
|                   | 5.5                                     | (Wang et al., 2010)       |
|                   | 15.2                                    | (Song et al., 2013)       |
|                   | 21.3                                    | (Song et al., 2013)       |
| RED               | 1.16                                    | (Yip and Elimelech, 2014) |
|                   | 1.75                                    | (Yip and Elimelech, 2014) |
|                   | 3.45                                    | (Yip and Elimelech, 2014) |
|                   | 6.32                                    | (Vermaas et al., 2012)    |
| NPG               | 3.9                                     | (Hwang et al., 2016)      |
|                   | 4.6                                     | (Chen et al., 2020)       |
|                   | 5.1                                     | (Zhang et al., 2020)      |
|                   | 7.7                                     | (Kim et al., 2010)        |
|                   | 22.4                                    | (Li et al., 2021)         |
|                   | 33.2                                    | (Li et al., 2021)         |
|                   | 67                                      | (Liu et al., 2020)        |

**Table S3. Summary of levelized cost of electricity (LCOE) achieved by various technologies**

| <b>Technology</b> | <b>LCOE (\$ kWh<sup>-1</sup>)</b> | <b>Reference</b>         |
|-------------------|-----------------------------------|--------------------------|
| PRO               | 0.3                               | (Lee et al., 1981)       |
|                   | 1.0                               | (Newby et al., 2021)     |
|                   | 1.2                               | (Makabe et al., 2021)    |
|                   | 2.37                              | (Newby et al., 2021)     |
|                   | 6.3                               | (Weiner et al., 2015)    |
|                   | 7.13                              | (Weiner et al., 2015)    |
| RED               | 1.14                              | (Giacalone et al., 2019) |
|                   | 1.52                              | (Giacalone et al., 2019) |
|                   | 1.56                              | (Giacalone et al., 2019) |
|                   | 1.89                              | (Giacalone et al., 2019) |
|                   | 5.83                              | (Yip et al., 2016)       |
|                   | 5.88                              | (Giacalone et al., 2019) |
|                   | 6.56                              | (Yip et al., 2016)       |
|                   | 7.85                              | (Giacalone et al., 2019) |
| Solar             | 0.09                              | (Mudgal et al., 2019)    |
|                   | 0.25                              | (Benti et al., 2022)     |
|                   | 0.3                               | (Benti et al., 2022)     |
|                   | 0.4                               | (Yip et al., 2016)       |
|                   | 0.6                               | (Musi et al., 2017)      |
| Wind              | 0.048                             | (Dao et al., 2019)       |
|                   | 0.050                             | (Anonymous, n.d.)        |
|                   | 0.057                             | (Dao et al., 2019)       |
|                   | 0.061                             | (Dao et al., 2019)       |
|                   | 0.066                             | (Ashuri et al., 2014)    |
|                   | 0.093                             | (Dao et al., 2019)       |
|                   | 0.142                             | (Dao et al., 2019)       |

## **Note S2. Calculation of thermodynamic energy efficiency**

From literature (Lin, 2020), the Gibbs free energy per volume of product water,  $\Delta g_w$ , can be calculated as

$$\Delta g_w = \pi_0 \left\{ \frac{1}{WR} \ln \left[ \frac{1 - WR(1 - SR)}{1 - WR} \right] - (1 - SR) \ln \left[ \frac{1 - WR(1 - SR)}{(1 - SR)(1 - WR)} \right] \right\} \quad (S2)$$

where  $\pi_0$  is the osmotic pressure of the feed,  $WR$  is the water recovery, and  $SR$  is the salt rejection.

With the  $\Delta g_w$ , the thermodynamic energy efficiency,  $TEE$ , can be calculated as

$$TEE = \frac{\Delta g_w}{SEC} \quad (S3)$$

where  $SEC$  is the specific energy consumption per volume of product water.

## **References**

Anonymous. Lazard.Com | Levelized Cost of Energy and of Storage 2020. n.d. Available from: <https://www.lazard.com/perspective/levelized-cost-of-energy-levelized-cost-of-storage-and-levelized-cost-of-hydrogen-2020/> [Last accessed: 12/17/2022].

Ashuri T, Zaaier MB, Martins JRRA, et al. Multidisciplinary Design Optimization of Offshore Wind Turbines for Minimum Levelized Cost of Energy. *Renew Energy* 2014;68:893–905; doi: 10.1016/J.RENENE.2014.02.045.

Benti NE, Mekonnen YS, Asfaw AA, et al. Techno-Economic Analysis of Solar Energy System for Electrification of Rural School in Southern Ethiopia. *http://www.editorialmanager.com/cogenteng* 2022;9(1); doi: 10.1080/23311916.2021.2021838.

Chen J, Xin W, Kong XY, et al. Ultrathin and Robust Silk Fibroin Membrane for High-Performance Osmotic Energy Conversion. *ACS Energy Lett* 2020;5(3):742–748; doi: 10.1021/ACSENERGYLETT.9B02296/ASSET/IMAGES/MEDIUM/NZ9B02296\_M004.GIF.

Dao C, Kazemtabrizi B and Crabtree C. Wind Turbine Reliability Data Review and Impacts on Levelised Cost of Energy. *Wind Energy* 2019;22(12):1848–1871; doi: 10.1002/WE.2404.

Giacalone F, Papapetrou M, Kosmadakis G, et al. Application of Reverse Electrodialysis to Site-Specific Types of Saline Solutions: A Techno-Economic Assessment. *Energy* 2019;181:532–547; doi: 10.1016/J.ENERGY.2019.05.161.

Hwang J, Kataoka S, Endo A, et al. Enhanced Energy Harvesting by Concentration Gradient-Driven Ion Transport in SBA-15 Mesoporous Silica Thin Films. *Lab Chip* 2016;16(19):3824–3832; doi: 10.1039/C6LC00844E.

Kim DK, Duan C, Chen YF, et al. Power Generation from Concentration Gradient by Reverse Electrodialysis in Ion-Selective Nanochannels. *Microfluid Nanofluidics* 2010;9(6):1215–1224; doi: 10.1007/S10404-010-0641-0/TABLES/3.

Li C, Wen L, Sui X, et al. Large-Scale, Robust Mushroom-Shaped Nanochannel Array Membrane for Ultrahigh Osmotic Energy Conversion. *Sci Adv* 2021;7(21); doi: 10.1126/SCIADV.ABG2183/SUPPL\_FILE/ABG2183\_SM.PDF.

Lin S. Energy Efficiency of Desalination: Fundamental Insights from Intuitive Interpretation. *Environ Sci Technol* 2020; doi: 10.1021/ACS.EST.9B04788/ASSET/IMAGES/LARGE/ES9B04788\_0001.JPEG.

Liu X, He M, Calvani D, et al. Power Generation by Reverse Electrodialysis in a Single-Layer Nanoporous Membrane Made from Core–Rim Polycyclic Aromatic Hydrocarbons. *Nature Nanotechnology* 2020 15:4 2020;15(4):307–312; doi: 10.1038/s41565-020-0641-5.

Makabe R, Ueyama T, Sakai H, et al. Commercial Pressure Retarded Osmosis Systems for Seawater Desalination Plants. *Membranes* 2021, Vol 11, Page 69 2021;11(1):69; doi: 10.3390/MEMBRANES11010069.

Mudgal V, Reddy KS and Mallick TK. Techno-Economic Analysis of Standalone Solar Photovoltaic-Wind-Biogas Hybrid Renewable Energy System for Community Energy Requirement. *Future Cities and Environment* 2019;5(1); doi: 10.5334/FCE.72/METRICS/.

Musi R, Grange B, Sgouridis S, et al. Techno-Economic Analysis of Concentrated Solar Power Plants in Terms of Levelized Cost of Electricity. *AIP Conf Proc* 2017;1850(1):160018; doi: 10.1063/1.4984552.

Newby AN, Bartholomew T v. and Mauter MS. The Economic Infeasibility of Salinity Gradient Energy via Pressure Retarded Osmosis. *ACS ES&T Engineering* 2021;1(7):1113–1121; doi: 10.1021/ACSESTENGG.1C00078.

Song X, Liu Z and Sun DD. Energy Recovery from Concentrated Seawater Brine by Thin-Film Nanofiber Composite Pressure Retarded Osmosis Membranes with High Power Density. *Energy Environ Sci* 2013;6(4):1199–1210; doi: 10.1039/C3EE23349A.

Tirafferri A, Yip NY, Phillip WA, et al. Relating Performance of Thin-Film Composite Forward Osmosis Membranes to Support Layer Formation and Structure. *J Memb Sci* 2011;367(1–2):340–352; doi: 10.1016/J.MEMSCI.2010.11.014.

Vermaas DA, Guler E, Saakes M, et al. Theoretical Power Density from Salinity Gradients Using Reverse Electrodialysis. *Energy Procedia* 2012;20:170–184; doi: 10.1016/J.EGYPRO.2012.03.018.

Wang L, Wang Z, Patel SK, et al. Nanopore-Based Power Generation from Salinity Gradient: Why It Is Not Viable. *ACS Nano* 2021;15(3):4093–4107; doi: 10.1021/ACSNANO.0C08628/ASSET/IMAGES/MEDIUM/NN0C08628\_M046.GIF.

Wang R, Shi L, Tang CY, et al. Characterization of Novel Forward Osmosis Hollow Fiber Membranes. *J Memb Sci* 2010;355(1–2):158–167; doi: 10.1016/J.MEMSCI.2010.03.017.

Wang Z, Wang L and Elimelech M. Viability of Harvesting Salinity Gradient (Blue) Energy by Nanopore-Based Osmotic Power Generation. *Engineering* 2022;9:51–60; doi: 10.1016/J.ENG.2021.02.016.

Weiner AM, McGovern RK and Lienhard V. JH. A New Reverse Electrodialysis Design Strategy Which Significantly Reduces the Levelized Cost of Electricity. *J Memb Sci* 2015;493:605–614; doi: 10.1016/J.MEMSCI.2015.05.058.

Yip NY, Brogioli D, Hamelers HVM, et al. Salinity Gradients for Sustainable Energy: Primer, Progress, and Prospects. *Environ Sci Technol* 2016;50(22):12072–12094; doi: 10.1021/ACS.EST.6B03448/ASSET/IMAGES/LARGE/ES-2016-03448C\_0008.JPEG.

Yip NY and Elimelech M. Thermodynamic and Energy Efficiency Analysis of Power Generation from Natural Salinity Gradients by Pressure Retarded Osmosis. *Environ Sci Technol* 2012;46(9):5230–5239; doi: 10.1021/ES300060M/SUPPL\_FILE/ES300060M\_SI\_001.PDF.

Yip NY and Elimelech M. Comparison of Energy Efficiency and Power Density in Pressure Retarded Osmosis and Reverse Electrodialysis. *Environ Sci Technol* 2014;48(18):11002–11012; doi: 10.1021/ES5029316/SUPPL\_FILE/ES5029316\_SI\_001.PDF.

Zhang Z, He L, Zhu C, et al. Improved Osmotic Energy Conversion in Heterogeneous Membrane Boosted by Three-Dimensional Hydrogel Interface. *Nature Communications* 2020 11:1 2020;11(1):1–8; doi: 10.1038/s41467-020-14674-6.
